# Supplementary material for: Assembly of 809 whole mitochondrial genomes with clinical, imaging, and fluid biomarker phenotyping
Source: PubMed Central journal article supplement — Alzheimers Dement. Author manuscript; Available in PMC 2018 May 21. (PMC5961720; doi:10.1016/j.jalz.2017.11.013), 2018-01-05
Supplement: NIHMS960158-supplement-2.pdf [file NIHMS960158-supplement-2.pdf]

## Read Mapping

### Details

- Reads mapped with Burrows-Wheeler Aligner (BWA) version 0.6.1. BWA aln and BWA sampe were used.
- Reads were mapped to NC\_012920.

## Refine Read Mappings

### Details

- Mappings were refined using the Genome Analysis Toolkit (GATK) version 2.5-2.
- First, we realigned reads around indels using RealignerTargetCreator and IndelRealigner
- Second, we performed base recalibration using BaseRecalibrator and PrintReads

## Joint-call variants

### Details

- Called variants for all samples concurrently using FreeBayes, version 1.0.2, with settings: -p 1 -F 0.6.

## Annotate variants

### Details

- Annotate variants based on previously observed variants. Downloaded and used variant information from MITOMAP. Included: variant frequency, source, locus name, etc. for each known variant.
- Determined mitochondrial haplogroup using Phy-Mer, version 1.0, and selecting the most probable haplogroup for each sample.
